# Supplementary material for: Population-level estimates of hepatitis C reinfection post scale-up of direct-acting antivirals among people who inject drugs
Source: PubMed Central journal article supplement — J Hepatol. 2022 Mar;76(3):549–57. doi: 10.1016/j.jhep.2021.09.038 (PMC8852744; doi:10.1016/j.jhep.2021.09.038), 2022-03
Supplement: mmc1.pdf [file mmc1.pdf]

# Population-level estimates of hepatitis C reinfection post scale-up of direct-acting antivirals among people who inject drugs

Alan Yeung, Norah E. Palmateer, John F. Dillon, Scott A. McDonald, Shanley Smith, Stephen Barclay, Peter C. Hayes, Rory N. Gunson, Kate Templeton, David J. Goldberg, Matthew Hickman, Sharon J. Hutchinson

## Table of contents

|                |   |
|----------------|---|
| Table S1.....  | 2 |
| Table S2 ..... | 3 |
| Table S3.....  | 4 |
| Table S4.....  | 5 |
| Table S5.....  | 6 |
| Table S6.....  | 7 |
| Table S7.....  | 8 |
| Table S8.....  | 9 |

**Table S1** PWID cohort in Scotland by time of initiating treatment for HCV, NHS board of treatment and treatment setting.

|                                  | <b>2000-2009</b><br>n (% within NHS board) | <b>2010-2014</b><br>n (% within NHS board) | <b>2015-2016</b><br>n (% within NHS board) | <b>2017-2018</b><br>n (% within NHS board) |
|----------------------------------|--------------------------------------------|--------------------------------------------|--------------------------------------------|--------------------------------------------|
| <b>Greater Glasgow and Clyde</b> | <b>410</b>                                 | <b>863</b>                                 | <b>854</b>                                 | <b>1102</b>                                |
| Hospital                         | 26 (6.3%)                                  | 679 (78.7%)                                | 722 (84.5%)                                | 731 (66.3%)                                |
| Community                        | 0 (0.0%)                                   | 30 (3.5%)                                  | 64 (7.5%)                                  | 303 (27.5%)                                |
| Prison                           | 0 (0.0%)                                   | 70 (8.1%)                                  | 66 (7.7%)                                  | 68 (6.2%)                                  |
| Other/Not Known                  | 384 (93.7%)                                | 84 (9.7%)                                  | 2 (0.2%)                                   | 0 (0.0%)                                   |
| <b>Grampian/Lothian</b>          | <b>331</b>                                 | <b>421</b>                                 | <b>346</b>                                 | <b>341</b>                                 |
| Hospital                         | 179 (54.1%)                                | 348 (82.7%)                                | 264 (76.3%)                                | 200 (58.7%)                                |
| Community                        | 7 (2.1%)                                   | 56 (13.3%)                                 | 70 (20.2%)                                 | 120 (35.2%)                                |
| Prison                           | 11 (3.3%)                                  | 17 (4.0%)                                  | 11 (3.2%)                                  | 21 (6.2%)                                  |
| Other/Not Known                  | 134 (40.5%)                                | 0 (0.0%)                                   | 1 (0.3%)                                   | 0 (0.0%)                                   |
| <b>Tayside</b>                   | <b>145</b>                                 | <b>303</b>                                 | <b>226</b>                                 | <b>344</b>                                 |
| Hospital                         | 1 (0.7%)                                   | 82 (27.1%)                                 | 73 (32.3%)                                 | 52 (15.1%)                                 |
| Community                        | 0 (0.0%)                                   | 141 (46.5%)                                | 125 (55.3%)                                | 259 (75.3%)                                |
| Prison                           | 0 (0.0%)                                   | 38 (12.5%)                                 | 28 (12.4%)                                 | 33 (9.6%)                                  |
| Other/Not Known                  | 144 (99.3%)                                | 42 (13.9%)                                 | 0 (0.0%)                                   | 0 (0.0%)                                   |

NHS = National Health Service.

**Table S2** Characteristics of the PWID cohort treated for HCV in Scotland and the numbers that were followed up for reinfection.

|                                               | Number achieved SVR<br>N1 (col %)* | Number with<br>confirmatory negative<br>SVR test<br>N2 (% of N1)** | Number with at least<br>one follow-up test<br>post-SVR<br>N3 (% of N1)** |
|-----------------------------------------------|------------------------------------|--------------------------------------------------------------------|--------------------------------------------------------------------------|
| Total                                         | 5686                               | 5145 (90.5)                                                        | 4126 (72.6)                                                              |
| <b>Time of Treatment Initiation</b>           |                                    |                                                                    |                                                                          |
| 2000-2009                                     | 886 (15.6)                         | 694 (78.3)                                                         | 588 (66.4)                                                               |
| 2010-2014                                     | 1587 (27.9)                        | 1372 (86.5)                                                        | 1137 (71.6)                                                              |
| 2015-2016                                     | 1426 (25.1)                        | 1354 (95.0)                                                        | 1185 (83.1)                                                              |
| 2017-2018                                     | 1787 (31.4)                        | 1725 (96.5)                                                        | 1216 (68.0)                                                              |
| <b>NHS Board of Treatment</b>                 |                                    |                                                                    |                                                                          |
| Greater Glasgow and Clyde                     | 3229 (56.8)                        | 3053 (94.5)                                                        | 2624 (81.3)                                                              |
| Grampian/Lothian                              | 1439 (25.3)                        | 1229 (85.4)                                                        | 990 (68.8)                                                               |
| Tayside                                       | 1018 (17.9)                        | 863 (84.8)                                                         | 512 (50.3)                                                               |
| <b>Treatment Setting</b>                      |                                    |                                                                    |                                                                          |
| Hospital                                      | 3357 (59.0)                        | 3090 (92.0)                                                        | 2589 (77.1)                                                              |
| Community                                     | 1175 (20.7)                        | 1103 (93.9)                                                        | 778 (66.2)                                                               |
| Prison                                        | 363 (6.4)                          | 323 (89.0)                                                         | 252 (69.4)                                                               |
| Other/Not Known                               | 791 (13.9)                         | 629 (79.5)                                                         | 507 (64.1)                                                               |
| <b>Gender</b>                                 |                                    |                                                                    |                                                                          |
| Female                                        | 1355 (23.8)                        | 1201 (88.6)                                                        | 920 (67.9)                                                               |
| Male                                          | 4331 (76.2)                        | 3944 (91.1)                                                        | 3206 (74.0)                                                              |
| <b>Age (Years)</b>                            |                                    |                                                                    |                                                                          |
| 50+                                           | 1218 (21.4)                        | 1157 (95.0)                                                        | 955 (78.4)                                                               |
| 35-49                                         | 3286 (57.8)                        | 2989 (91.0)                                                        | 2383 (72.5)                                                              |
| <35                                           | 1182 (20.8)                        | 999 (84.5)                                                         | 788 (66.7)                                                               |
| <b>Cirrhosis at Time of Treatment</b>         |                                    |                                                                    |                                                                          |
| No                                            | 4544 (79.9)                        | 4074 (89.7)                                                        | 3203 (70.5)                                                              |
| Yes                                           | 1142 (20.1)                        | 1071 (93.8)                                                        | 923 (80.8)                                                               |
| <b>Opioid/Injection Hospital Admission</b>    |                                    |                                                                    |                                                                          |
| >3 Years Pre-Treatment/Never Pre-Treatment    | 4452 (78.3)                        | 4032 (90.6)                                                        | 3245 (72.9)                                                              |
| During Treatment/In the 3 Years Pre-Treatment | 1234 (21.7)                        | 1113 (90.2)                                                        | 881 (71.4)                                                               |

\*Achieved SVR according to the Scottish HCV clinical database. Patients can achieve SVR more than once if they were reinfected.

\*\*HCV RNA or antigen test.

NHS = National Health Service. SVR = sustained virological response.

**Table S3** Retreatment for HCV among PWID with reinfections diagnosed between 2015-2017.

|                                               | Reinfections diagnosed 2015-2017 | Number retreated | % retreated | Time to retreatment (Years; Median, IQR) | Number not retreated |
|-----------------------------------------------|----------------------------------|------------------|-------------|------------------------------------------|----------------------|
| Total                                         | 79                               | 49               | 62%         | 1.2 (0.6-1.8)                            | 30                   |
| <b>NHS Board of Treatment</b>                 |                                  |                  |             |                                          |                      |
| Greater Glasgow and Clyde                     | 42                               | 19               | 45%         | 0.8 (0.6-1.5)                            | 23                   |
| Grampian/Lothian                              | 9                                | 6                | 67%         | 1.1 (0.4-2.1)                            | 3                    |
| Tayside                                       | 28                               | 24               | 86%         | 1.4 (0.8-2.1)                            | 4                    |
| <b>Treatment Setting</b>                      |                                  |                  |             |                                          |                      |
| Hospital                                      | 31                               | 14               | 45%         | 0.8 (0.6-1.4)                            | 17                   |
| Community                                     | 35                               | 28               | 80%         | 1.5 (0.8-2.1)                            | 7                    |
| Prison                                        | 13                               | 7                | 54%         | 1.2 (0.6-1.6)                            | 6                    |
| <b>Gender</b>                                 |                                  |                  |             |                                          |                      |
| Female                                        | 17                               | 10               | 59%         | 1.3 (0.6-2.1)                            | 7                    |
| Male                                          | 62                               | 39               | 63%         | 1.2 (0.6-1.6)                            | 23                   |
| <b>Age (Years)</b>                            |                                  |                  |             |                                          |                      |
| 50+                                           | 12                               | 7                | 58%         | 1.1 (0.9-1.9)                            | 5                    |
| 35-49                                         | 50                               | 31               | 62%         | 0.8 (0.5-1.5)                            | 19                   |
| <35                                           | 17                               | 11               | 65%         | 2.1 (1.4-2.4)                            | 6                    |
| <b>Cirrhosis at Time of Treatment</b>         |                                  |                  |             |                                          |                      |
| No                                            | 62                               | 42               | 68%         | 1.4 (0.7-1.8)                            | 20                   |
| Yes                                           | 17                               | 7                | 41%         | 0.6 (0.5-0.8)                            | 10                   |
| <b>Opioid/Injection Hospital Admission</b>    |                                  |                  |             |                                          |                      |
| >3 Years Pre-Treatment/Never Pre-Treatment    | 43                               | 25               | 58%         | 1.3 (0.6-1.8)                            | 18                   |
| During Treatment/In the 3 Years Pre-Treatment | 36                               | 24               | 67%         | 1.1 (0.5-1.5)                            | 12                   |

IQR = interquartile range. NHS = National Health Service.

**Table S4** HCV reinfection rates for PWID treated between 2015-2018 within the first, second and third years of follow-up since SVR.

| Year of Follow-up Since SVR | Time of Treatment Initiation | Reinfections | Person-Years | Reinfection Rate per 100 PY |
|-----------------------------|------------------------------|--------------|--------------|-----------------------------|
| 1                           | 2015-2016                    | 36           | 906          | 4.0 (2.8-5.4)               |
|                             | 2017-2018                    | 65           | 693          | 9.4 (7.3-11.9)              |
|                             | 2015-2018                    | 101          | 1,599        | 6.3 (5.2-7.6)               |
| 2                           | 2015-2016                    | 45           | 520          | 8.7 (6.4-11.5)              |
|                             | 2017-2018                    | 9            | 144          | 6.3 (3.1-11.4)              |
|                             | 2015-2018                    | 54           | 663          | 8.1 (6.2-10.5)              |
| 3                           | 2015-2016                    | 13           | 287          | 4.5 (2.5-7.5)               |
|                             | 2017-2018                    | 0            | 5            | 0.0 (0.0-46.5)              |
|                             | 2015-2018                    | 13           | 292          | 4.5 (2.5-7.4)               |

PY = person-years. SVR = sustained virological response.

**Table S5** Number of SVR events for PWID treated for HCV between 2015-2018 and tested for HCV within different time intervals following SVR.

| Time of treatment initiation | No. tested 0-11 months post-SVR / No. with SVR* | No. tested 12-23 months post-SVR / No. with $\geq 12$ months follow-up possible* | No. tested $\geq 24$ months post-SVR / No. with $\geq 24$ months follow-up possible* | No. tested any time post-SVR / No. with SVR* |
|------------------------------|-------------------------------------------------|----------------------------------------------------------------------------------|--------------------------------------------------------------------------------------|----------------------------------------------|
| 2015-2016                    | 1067/1426 (75%)                                 | 468/1389 (34%)                                                                   | 484/1342 (36%)                                                                       | 1242/1426 (87%)                              |
| 2017-2018                    | 1133/1787 (63%)                                 | 349/1372 (25%)                                                                   | 37/331 (11%)                                                                         | 1252/1787 (70%)                              |
| 2015-2018                    | 2200/3213 (68%)                                 | 817/2761 (30%)                                                                   | 521/1673 (31%)                                                                       | 2494/3213 (78%)                              |

\*HCV RNA/Ag test; follow-up time possible starts from the date of their confirmatory SVR test (or 12 weeks post-treatment where a SVR test was not identified) up to the earliest of the end of 2019, death or migration.

SVR = sustained virological response.

**Table S6** Number of SVR events observed between 2015-2018 and person-time contributed to estimate reinfection as well as the number of SVR events and person-time that could not be observed due to incomplete retesting for HCV.

|                                  | Observed SVR events | Observed PY | Unobserved SVR events* | Unobserved PY** |
|----------------------------------|---------------------|-------------|------------------------|-----------------|
| Total                            | 2401                | 2646        | 678                    | 3997            |
| <b>Greater Glasgow and Clyde</b> | <b>1649</b>         | <b>1870</b> | <b>251</b>             | <b>2168</b>     |
| Hospital                         | 1225                | 1477        | 180                    | 1754            |
| Community                        | 313                 | 281         | 49                     | 282             |
| Prison                           | 109                 | 109         | 22                     | 128             |
| Other/Not Known                  | 2                   | 3           | 0                      | 4               |
| <b>Grampian/Lothian</b>          | <b>485</b>          | <b>477</b>  | <b>174</b>             | <b>1096</b>     |
| Hospital                         | 341                 | 337         | 107                    | 801             |
| Community                        | 117                 | 112         | 63                     | 254             |
| Prison                           | 26                  | 28          | 4                      | 39              |
| Other/Not Known                  | 1                   | 0           | 0                      | 3               |
| <b>Tayside</b>                   | <b>267</b>          | <b>299</b>  | <b>253</b>             | <b>732</b>      |
| Hospital                         | 64                  | 54          | 42                     | 218             |
| Community                        | 180                 | 215         | 179                    | 434             |
| Prison                           | 23                  | 31          | 32                     | 80              |

\*PWID who attained SVR according to the HCV clinical database and had a confirmatory SVR test identified on the HCV test database but could not be followed up for reinfection because they had no follow-up HCV RNA/Ag test.

\*\*For patients that could be followed up for reinfection, unobserved person-time is the time between their latest HCV RNA/Ag test and the end of the study period; for patients that could not be followed up, unobserved person-time is the amount of time between their confirmatory SVR test and the end of the study period.

PY = person-years. SVR = sustained virological response.

**Table S7** HCV reinfection rates per 100 person-years for observed data and observed data supplemented with simulated data to give complete follow up for PWID initiating treatment in 2015-2018. Reinfection rates used in simulations were halved to account for the possibility of reduced reinfection risk for unobserved periods. An additional 678 patients with a confirmatory SVR test identified on the HCV test database but no follow-up test post-SVR were included in simulations.

|                                       | Observed Data |                        |      | Estimated from Simulation             |                                            |                                      |              |                                              |
|---------------------------------------|---------------|------------------------|------|---------------------------------------|--------------------------------------------|--------------------------------------|--------------|----------------------------------------------|
|                                       | SVR events    | Diagnosed reinfections | PY   | Reinfection rate per 100 PY (95% CI)* | Undiagnosed reinfections (Median, 95% CI)* | Total reinfections (Median, 95% CI)* | PY (Median)* | Reinfection rate per 100 PY (Median, 95% CI) |
| <b>Total</b>                          | 2401          | 169                    | 2646 | 6.4 (5.5-7.5)                         | 104 (87-125)                               | 273 (256-294)                        | 6484         | 4.2 (3.5-5.1)                                |
| <b>Time of Treatment Initiation**</b> |               |                        |      |                                       |                                            |                                      |              |                                              |
| 2015-2016                             | 1185          | 95                     | 1803 | 5.3 (4.3-6.5)                         | 52 (39-66)                                 | 147 (134-161)                        | 4099         | 3.6 (2.7-4.6)                                |
| 2017-2018                             | 1216          | 74                     | 843  | 8.8 (7.0-11.1)                        | 53 (40-66)                                 | 127 (114-140)                        | 2386         | 5.3 (4.0-6.9)                                |
| <b>Treatment Setting</b>              |               |                        |      |                                       |                                            |                                      |              |                                              |
| Hospital                              | 1633          | 68                     | 1871 | 3.6 (2.8-4.6)                         | 42 (30-55)                                 | 110 (98-123)                         | 4566         | 2.4 (1.8-3.2)                                |
| Community                             | 610           | 66                     | 608  | 10.9 (8.5-13.9)                       | 43 (31-56)                                 | 109 (97-122)                         | 1531         | 7.1 (5.2-9.6)                                |
| Prison                                | 158           | 35                     | 167  | 20.9 (14.8-29.5)                      | 19 (12-28)                                 | 54 (47-63)                           | 388          | 14.0 (8.8-21.0)                              |
| <b>NHS Board of Treatment</b>         |               |                        |      |                                       |                                            |                                      |              |                                              |
| Greater Glasgow and Clyde             | 1649          | 110                    | 1870 | 5.9 (4.9-7.1)                         | 51 (38-64)                                 | 161 (148-174)                        | 3960         | 4.1 (3.2-5.1)                                |
| Grampian/Lothian                      | 485           | 11                     | 477  | 2.3 (1.3-4.3)                         | 13 (7-21)                                  | 24 (18-32)                           | 1549         | 1.5 (0.7-2.9)                                |
| Tayside                               | 267           | 48                     | 299  | 16.1 (12.0-21.6)                      | 41 (30-53)                                 | 89 (78-101)                          | 976          | 9.1 (6.3-12.6)                               |
| <b>Age (Years)</b>                    |               |                        |      |                                       |                                            |                                      |              |                                              |
| 50+                                   | 730           | 25                     | 724  | 3.5 (2.3-5.1)                         | 19 (12-28)                                 | 44 (37-53)                           | 1960         | 2.2 (1.3-3.5)                                |
| 35-49                                 | 1414          | 110                    | 1612 | 6.8 (5.6-8.3)                         | 60 (47-76)                                 | 170 (157-186)                        | 3774         | 4.5 (3.5-5.7)                                |
| <35                                   | 257           | 34                     | 310  | 11.0 (7.8-15.5)                       | 25 (16-35)                                 | 59 (50-69)                           | 751          | 7.9 (5.0-11.6)                               |

\*Median and 95% confidence intervals estimated from 1000 simulations.

\*\*Estimates of undiagnosed reinfection were based on observed data on diagnosed reinfection multiplied by half; estimates for those initiating treatment in 2015-16 were based on observed data from those treated during 2014-16, and estimates for those initiating treatment in 2017-18 were based on observed data from those treated during 2014-18.

CI = confidence interval. NHS = National Health Service. PY = person-years.

**Table S8** HCV reinfection rates per 100 person-years for observed data and observed data supplemented with simulated data to give complete follow up for PWID initiating treatment in 2015-2018. Reinfection rates used in simulations were increased by 50% to account for the possibility of increased reinfection risk for unobserved periods. An additional 678 patients with a confirmatory SVR test identified on the HCV test database but no follow-up test post-SVR were included in simulations.

|                                       | Observed Data |                        |      | Estimated from Simulation             |                                            |                                      |              |                                              |
|---------------------------------------|---------------|------------------------|------|---------------------------------------|--------------------------------------------|--------------------------------------|--------------|----------------------------------------------|
|                                       | SVR events    | Diagnosed reinfections | PY   | Reinfection rate per 100 PY (95% CI)* | Undiagnosed reinfections (Median, 95% CI)* | Total reinfections (Median, 95% CI)* | PY (Median)* | Reinfection rate per 100 PY (Median, 95% CI) |
| <b>Total</b>                          | 2401          | 169                    | 2646 | 6.4 (5.5-7.5)                         | 285 (257-315)                              | 454 (426-484)                        | 6356         | 7.1 (6.1-8.4)                                |
| <b>Time of Treatment Initiation**</b> |               |                        |      |                                       |                                            |                                      |              |                                              |
| 2015-2016                             | 1185          | 95                     | 1803 | 5.3 (4.3-6.5)                         | 138 (119-159)                              | 233 (214-254)                        | 4021         | 5.8 (4.6-7.2)                                |
| 2017-2018                             | 1216          | 74                     | 843  | 8.8 (7.0-11.1)                        | 146 (126-168)                              | 220 (200-242)                        | 2336         | 9.4 (7.4-11.7)                               |
| <b>Treatment Setting</b>              |               |                        |      |                                       |                                            |                                      |              |                                              |
| Hospital                              | 1633          | 68                     | 1871 | 3.6 (2.8-4.6)                         | 120 (102-141)                              | 188 (170-209)                        | 4502         | 4.2 (3.2-5.3)                                |
| Community                             | 610           | 66                     | 608  | 10.9 (8.5-13.9)                       | 117 (99-135)                               | 183 (165-201)                        | 1486         | 12.3 (9.4-15.6)                              |
| Prison                                | 158           | 35                     | 167  | 20.9 (14.8-29.5)                      | 48 (38-58)                                 | 83 (73-93)                           | 367          | 22.7 (15.4-31.7)                             |
| <b>NHS Board of Treatment</b>         |               |                        |      |                                       |                                            |                                      |              |                                              |
| Greater Glasgow and Clyde             | 1649          | 110                    | 1870 | 5.9 (4.9-7.1)                         | 142 (123-163)                              | 252 (233-273)                        | 3902         | 6.4 (5.2-7.9)                                |
| Grampian/Lothian                      | 485           | 11                     | 477  | 2.3 (1.3-4.3)                         | 36 (26-48)                                 | 47 (37-59)                           | 1531         | 3.1 (1.7-4.9)                                |
| Tayside                               | 267           | 48                     | 299  | 16.1 (12.0-21.6)                      | 107 (90-125)                               | 155 (138-173)                        | 923          | 16.7 (12.5-21.8)                             |
| <b>Age (Years)</b>                    |               |                        |      |                                       |                                            |                                      |              |                                              |
| 50+                                   | 730           | 25                     | 724  | 3.5 (2.3-5.1)                         | 54 (41-67)                                 | 79 (66-92)                           | 1932         | 4.1 (2.7-5.9)                                |
| 35-49                                 | 1414          | 110                    | 1612 | 6.8 (5.6-8.3)                         | 165 (143-188)                              | 275 (253-298)                        | 3701         | 7.4 (6.0-9.0)                                |
| <35                                   | 257           | 34                     | 310  | 11.0 (7.8-15.5)                       | 66 (52-79)                                 | 100 (86-113)                         | 724          | 13.8 (9.6-18.8)                              |

\*Median and 95% confidence intervals estimated from 1000 simulations.

\*\*Estimates of undiagnosed reinfection were based on observed data on diagnosed reinfection multiplied by 1.5; estimates for those initiating treatment in 2015-16 were based on observed data from those treated during 2014-16, and estimates for those initiating treatment in 2017-18 were based on observed data from those treated during 2014-18.

CI = confidence interval. NHS = National Health Service. PY = person-years.
